# Supplementary material
Source: PubMed Central journal article supplement (PMC2712259)

## Supplementary Figure 1

A. Synapse strength capable of runaway excitation

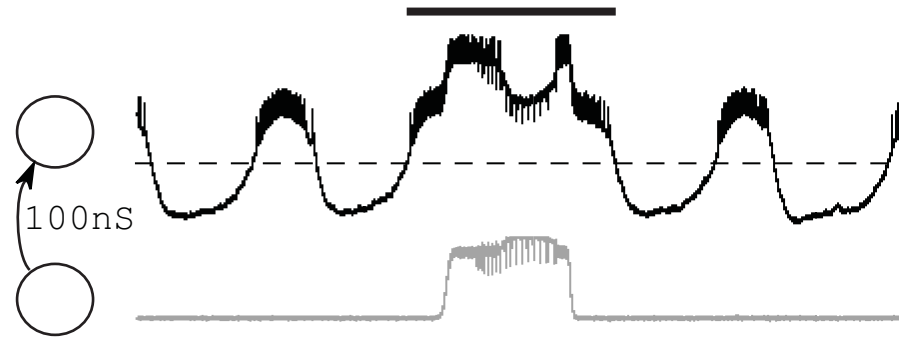

B. Synapse strength not capable of runaway excitation

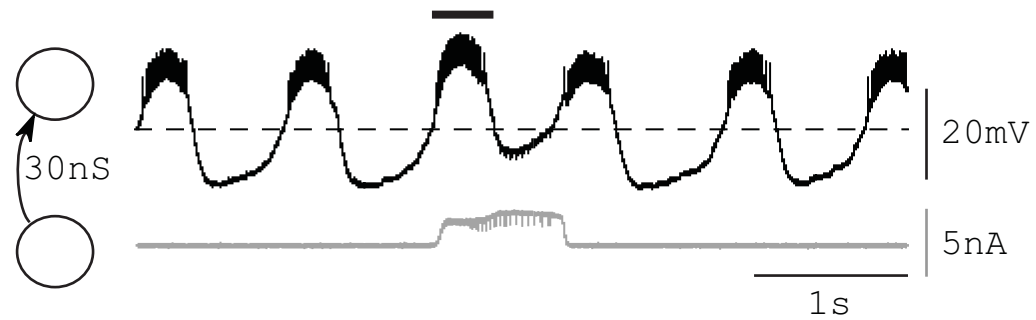

Supplement: 00091.2009_1.pdf [file 00091.2009_1.pdf]
